# ZIC1 Is Downregulated through Promoter Hypermethylation, and Functions as a Tumor Suppressor Gene in Colorectal Cancer

Lihong Gan<sup>1,9</sup>, Shujie Chen<sup>2,9</sup>, Jing Zhong<sup>1</sup>, Xian Wang<sup>3</sup>, Emily K. Y. Lam<sup>4</sup>, Xin Liu<sup>4</sup>, Jianbin Zhang<sup>4</sup>, Tianhua Zhou<sup>5</sup>, Jun Yu<sup>4</sup>, Jianmin Si<sup>2</sup>, Liangjing Wang<sup>1\*</sup>, Hongchuan Jin<sup>3</sup>

**1** Department of Gastroenterology, Second Affiliated Hospital, School of Medicine, Zhejiang University, Hangzhou, China, **2** Laboratory of Digestive Disease, Clinical Institution of Sir Run Run Shaw Hospital, Zhejiang University, Hangzhou, China, **3** Key Laboratory of Biotherapy of Zhejiang Province, Biomedical Research Center, Sir Run Run Shaw Hospital, School of Medicine, Zhejiang University, Hangzhou, China, **4** Department of Medicine and Therapeutics, Institute of Digestive Disease, Prince of Wales Hospital, The Chinese University of Hong Kong, Shatin, Hong Kong, SAR China, **5** Department of Cell Biology and Program in Molecular Cell Biology, School of Medicine Zhejiang University, Hangzhou, China

## Abstract

The transcription factor, Zinc finger of the cerebellum (ZIC1), plays a crucial role in vertebrate development. Recently, ZIC1 has also been found to participate in the progression of human cancers, including medulloblastomas, endometrial cancers, and mesenchymal neoplasms. However, the function of ZIC1 in colon cancer progression has not been defined. In this study, we demonstrate ZIC1 to be silenced or significantly downregulated in colon cancer cell lines. These effects were reversed by demethylation treatment with 5-aza-2'-deoxycytidine (Aza). ZIC1 expression is also significantly downregulated in primary colorectal cancer tissues relative to adjacent non-tumor tissues ( $p = 0.0001$ ). Furthermore, methylation of ZIC1 gene promoter is frequently detected in primary tumor tissues (85%, 34/40), but not in adjacent non-tumor tissues. Ectopic expression of ZIC1 suppresses cell proliferation and induces apoptosis, which is associated with MAPK and  $PI_3K/Akt$  pathways, as well as the Bcl-xl/Bad/Caspase3 cascade. To identify target candidates of ZIC1, we employed cDNA microarray and found that 337 genes are downregulated and 95 genes upregulated by ectopic expression of ZIC1, which were verified by 10 selected gene expressions by qRT-PCR. Taken together, our results suggest that ZIC1 may potentially function as a tumor suppressor gene, which is downregulated through promoter hypermethylation in colorectal cancers.

**Citation:** Gan L, Chen S, Zhong J, Wang X, Lam EKY, et al. (2011) ZIC1 Is Downregulated through Promoter Hypermethylation, and Functions as a Tumor Suppressor Gene in Colorectal Cancer. *PLoS ONE* 6(2): e16916. doi:10.1371/journal.pone.0016916

**Editor:** Irina Agoulnik, Florida International University, United States of America

**Received:** October 10, 2010; **Accepted:** January 3, 2011; **Published:** February 15, 2011

**Copyright:** © 2011 Gan et al. This is an open-access article distributed under the terms of the Creative Commons Attribution License, which permits unrestricted use, distribution, and reproduction in any medium, provided the original author and source are credited.

**Funding:** The study was supported by the National Natural Scientific Foundation of China (30900676), the Natural Scientific Foundation of Zhejiang Province of China (Y206280), and the Department of Science and Technology of Zhejiang Province of China (2009C03012-3). The funders had no role in study design, data collection and analysis, decision to publish, or preparation of the manuscript.

**Competing Interests:** The authors have declared that no competing interests exist.

\* E-mail: Wanglj76@hotmail.com

9 These authors contributed equally to this work.

## Introduction

Colorectal cancer (CRC) is the third most common cancer, as well as the third leading cause of cancer deaths worldwide [1]. The sequential accumulation of genetic and epigenetic alterations leads to the transformation of normal colonic epithelium to colorectal cancer [2]. These epigenetic changes, including promoter DNA methylation and histone modifications, can induce the inactivation of tumor suppressor genes (TSGs) [3–5]. DNA regions enriched with CpG dinucleotides, called CpG islands, can become hypermethylated in cancer cells and result in the silencing of TSGs [5]. A subset of CRCs display methylation of multiple genes, termed the CpG island methylator phenotype (CIMP) [2,5]. We and others have previously found that growing numbers of TSGs including APC, CDKN2A/p16, UCHL1, and TBX5 are frequently silenced through promoter hypermethylation in CRCs [2,6–9]. These events can occur in early stage of CRCs [9,10], which highlights the importance of promoter hypermethylation in the tumorigenesis of CRCs.

Located at chromosome 3q24, ZIC1 encodes a  $C_2H_2$ -type zinc finger transcription factor that plays a critical role in the

development of the neural crest and the cerebellum in vertebrates [11–15]. As zinc finger transcription factors, ZIC family proteins can bind to the GC-rich sequence in target genes [15]. Despite its role in neural development, ZIC1 was also found to participate in the progression of human cancers, such as medulloblastoma, endometrial cancers, and mesenchymal neoplasms [16–18]. We have identified ZIC1 as a novel candidate TSG in gastric cancer [19]. To support its role in cancer, ZIC1 can function as a repressor of the downstream target of sonic hedgehog (Shh), BMP (bone morphogenetic protein), and as well as play a role in Notch signaling pathway during neural tube development [14,15]. However, the biological significance of DNA methylation, and the molecular mechanism underlying ZIC1 functioning as a TSG in CRCs remain unknown. Here, we report that ZIC1 promoter is frequently methylated in CRCs tissues and colon cancer cell lines. Ectopic expression of ZIC1 leads to cell growth inhibition, and alter the expression of potential target genes that may play important roles in colorectal carcinogenesis. Our results suggest that ZIC1 may potentially function as a novel functional tumor suppressor in CRCs.

## Results

### Transcriptional silencing of ZIC1 is associated with its promoter hypermethylation in colon cancer cells

To determine whether ZIC1 is silenced by promoter hypermethylation in colon cancer, we examined the expression of ZIC1 mRNA in six colon cancer cell lines. Semi-quantitative RT-PCR showed that ZIC1 transcript was silenced or downregulated in all of colon cancer cell lines when compared to normal colon tissue (**Figure 1A**). The demethylation treatment by Aza dramatically restored the expression of ZIC1 mRNA in a subset of colon cancer cells (HCT116, HT29 and SW620) (**Figure 1B**), implicating that DNA methylation may be involved in the regulation of ZIC1 expression. Furthermore, we employed methylation specific PCR (MSP) and found that three colon cancer cell lines (HCT116, DLD1 and SW620) were detected with full methylation. The other three cell lines (HT29, LS180 and SW480) were found with partial methylation. No methylation was detected in the normal colon tissues (**Figure 1C**). Thus, these results indicate that transcriptional silence of ZIC1 in colon cancer cell lines may be mediated by DNA promoter hypermethylation.

### Downregulation and promoter hypermethylation of ZIC1 in primary colorectal tumors

To further investigate the relationship between ZIC1 expression and promoter hypermethylation, we analyzed ZIC1 mRNA expression and CpG site methylation status in primary colorectal tumor and adjacent non-tumor tissues by qRT-PCR and MSP, respectively. The level of ZIC1 mRNA was significantly decreased in most tumor tissues relative to adjacent non-tumor tissues ( $p = 0.0001$ ,  $n = 24$ ) (**Figure 2A**). Additionally, promoter methylation was detected in 85% (34/40) of colorectal tumor tissues, but not in adjacent non-tumor tissues by MSP analysis (the representative data shown in **Figure 2B**), implying a tumor-specific hypermethylation of the ZIC1 promoter in CRCs. However, we failed to find a significant correlation between ZIC1 promoter methylation and clinical characteristics, such as age, gender, tumor differentiation, and TNM stage (**Table 1**).

### ZIC1 inhibits the proliferation of colon cancer cells

To explore the effect of ZIC1 on cell proliferation in colon cancer, we performed cell viability and colony formation assays in

CRC cell lines. First, the transfection efficiency of our ZIC1 construct was confirmed by RT-PCR and western blot in tumor cell lines (HCT116 and HT29) (**Figure 3A**). Next, we evaluated the suppressive effect of ZIC1 overexpression on cell proliferation by cell viability assay. As shown in **Figure 3B**, ectopic expression of ZIC1 significantly inhibited cell viability in HCT116 and HT29 cells ( $p < 0.05$ ). We also observed that the number of surviving colonies formed on the plates was significantly reduced when compared with the control vector transfectants ( $p < 0.01$ ) (**Figure 3C**). In addition, we revealed that ectopic expression of ZIC1 inhibited the phosphorylation of Erk1/2 and Akt kinases (**Figure 3D**), two key cell proliferation pathway regulators. These results confirmed the suppressive effect of ZIC1 on cell proliferation.

### Ectopic expression of ZIC1 induces cell apoptosis

To explore the mechanisms underlying the inhibition of cell proliferation by ectopic expression of ZIC1, we analyzed cell apoptosis and cell cycle by flow cytometry assay. As shown in **Figure 4A**, the cells transfected with ZIC1 induced cell apoptosis. In addition, our results showed that re-expression of ZIC1 led to the activating of apoptosis-related cascades, including cleavage of caspase3, downregulation of Bcl-xl, and Bad dephosphorylation (**Figure 4B**). These results indicate that the induction of cell apoptosis through overexpression of ZIC1 is mediated by the Bcl-xl/Bad/Caspase3 cascade. However, re-expression of ZIC1 did not affect cell cycle progression (data not shown).

### Gene expression profile changes by ectopic exogenous ZIC1 expression

To search for target genes of ZIC1 in colon cancer cells, we utilized cDNA microarray to analyze gene expression profile changes induced by ectopic expression of ZIC1. This analysis revealed that 337 genes were downregulated and 95 genes were upregulated by exogenous expression of ZIC1 when using a 2-fold change of expression as threshold (representative genes shown in **Figure 5A**). As shown in **Table 2**, many of these genes have been reported to play important roles in cell proliferation and apoptosis. To confirm the expression pattern observed in the microarray, we validated the expression of 10 selected genes in colon cancer cells transfected with ZIC1 by qRT-PCR. The results showed that *CCNA2* (cyclin A2) and *IGFBP3* (insulin-like growth factor binding

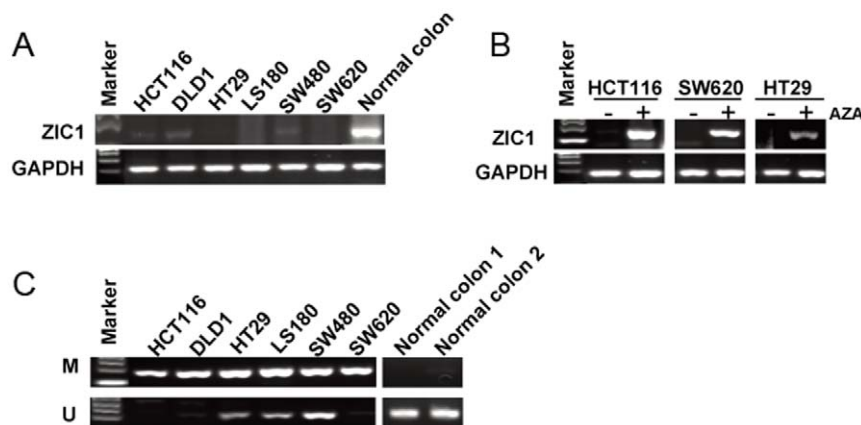

**Figure 1. Promoter methylation contributes to ZIC1 downregulation in colon cancer cell lines.** (A) The expression of ZIC1 is silenced or downregulated in colon cancer cell lines, when compared with normal colon tissue by RT-PCR. GAPDH was used as the internal control. **Normal colon:** Normal colon tissues. (B) ZIC1 expression is restored in colon cancer cells (HCT116, HT29 and SW620) after treatment with demethylation agent 5-Aza by RT-PCR. **AZA:** 5-aza-2'-deoxycytidine. (C) The methylation status of ZIC1 CpG promoter is detected by methylation-specific PCR (MSP) in colon cancer cell lines. **M:** methylated; **U:** unmethylated. doi:10.1371/journal.pone.0016916.g001

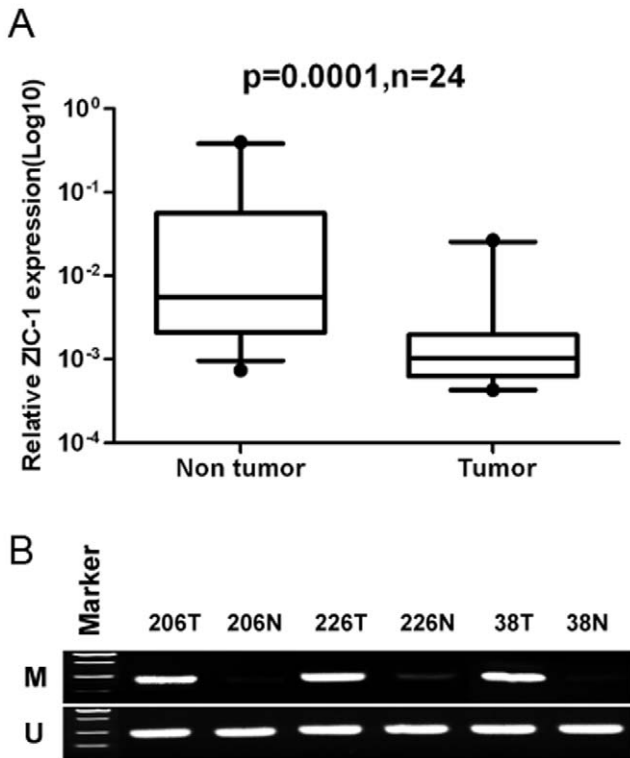

**Figure 2. Downregulation of ZIC1 expression and frequent hypermethylation of ZIC1 promoter in primary colorectal tumor tissues.** (A) ZIC1 mRNA expression was determined by quantitative real-time PCR in twenty four pairs of primary colorectal tumor and according adjacent non-tumor tissues. The data was analyzed by Wilcoxon matched pairs test. (B) The methylation status of ZIC1 promoter in primary colorectal carcinoma and adjacent non-tumor tissues was determined by MSP. Representative image are shown. **T:** tumor tissues; **N:** adjacent non-tumor tissues; **M:** methylated; **U:** unmethylated. doi:10.1371/journal.pone.0016916.g002

protein 3) were significantly upregulated (>2 fold change), whereas *ANGPT2* (angiopoietin 2), *GADD45B* (growth arrest and DNA-damage-inducible, beta), *LAMB2* (laminin, beta 2), *LAMB3* (laminin, beta 3), *MALAT1* (metastasis associated lung adenocarcinoma transcript 1), *PNMA2* (paraneoplastic antigen MA2), *RPA4* (replication protein A4), and *TACSTD2* (tumor-associated calcium signal transducer 2) (<-2 fold change) were downregulated by overexpression of ZIC1 in HCT116 and HT29 cells (Figure 5B and Table S1). These data were concordant with that obtained from the microarray analysis.

**Discussion**

In the present study, we found that ZIC1 was silenced or downregulated in colon cancer cell lines, as well as in primary tumor tissues relative to adjacent non-tumor tissues ( $p < 0.05$ ). Furthermore, our observations identify that promoter DNA hypermethylation contributes to ZIC1 silencing or downregulation in CRCs. These results are consistent with our previous study of ZIC1 in gastric cancer [19], indicating that promoter CpG methylation is the predominant mechanism for ZIC1 downregulation. However, we cannot exclude the appearance of other mechanisms in silencing of ZIC1, such as histone or nucleosome remodeling. For instance, ZIC1 expression failed to be restored after Aza treatment in LS180 and SW480 cell lines (data not shown). Recent studies illustrate that methylation of histone H<sub>3</sub> at lysine 27 is linked to ZIC1 silencing in

**Table 1. Clinicopathological features of ZIC1 methylation in colorectal cancer.**

| Characteristics | Methylated (n) | Unmethylated (n) | P-value |
|-----------------|----------------|------------------|---------|
| Age, years(±SD) | 60.6±13.1      | 60.2±5.1         | 0.939   |
| Gender          |                |                  | 0.489   |
| Male            | 19             | 4                |         |
| Female          | 15             | 2                |         |
| Differentiation |                |                  | 0.398   |
| Well            | 21             | 3                |         |
| Morderate       | 12             | 2                |         |
| Poor            | 1              | 1                |         |
| TNM Stage       |                |                  | 0.315   |
| I               | 3              | 2                |         |
| II              | 14             | 3                |         |
| III             | 16             | 1                |         |
| IV              | 1              | 0                |         |

doi:10.1371/journal.pone.0016916.t001

embryonic stem cells [18]. Chromatin immunoprecipitation assays show that the expression of ZIC1 is associated with histone H<sub>3</sub> dimethylation at lysine 4 in desmoids and MEF cells [18].

Despite the illustration of the critical role of ZIC1 in vertebrate development [13,15], functional characterization of ZIC1 in carcinogenesis remains largely unknown. Here, our results show that exogenous ZIC1 inhibits cell proliferation through p-Akt and p-Erk1/2 inactivation in colon cancer cells. PI<sub>3</sub>K/Akt and MAPK (Mitogen activated protein kinase) signaling pathways are well known to function as crucial components of cell proliferation in tumor cells [20,21]. Akt and Erk1/2, once activated by phosphorylation, can function as key effectors of PI<sub>3</sub>K and MAPK signaling pathways to promote cell survival and proliferation [20–24]. Thus, ZIC1 may mediate cell proliferation through PI<sub>3</sub>K/Akt and MAPK pathways in colon cancer cells. In addition, we found that ectopic expression of ZIC1 can induce apoptosis of colon cancer cells. Among the wide spectrum of proteins and genes involved in apoptosis, members of the Bcl-2 family play a central role in this process [25,26]. Caspase-3 has been identified as being a key mediator of apoptosis in mammalian cells, and the phosphorylation of Bad can block its apoptotic function [22,25,26]. In this regard, we found that the expression of cleaved-caspase3 and Bad were induced, while phospho-Bad and Bcl-xl were suppressed by re-expression of ZIC1. Our results suggest that induction of apoptosis by ZIC1 may be associated with Bcl-xl/Bad/Caspase3 cascade in colon cancer cells.

In an attempt to identify downstream targets of ZIC1 in CRCs, we analyzed the gene expression profiles of colon cancer cells with or without ZIC1 overexpression. The results revealed that 337 genes were downregulated and 95 genes were upregulated by ZIC1 (representative novel genes shown in Table 2). Many of these genes have been linked to cellular growth, apoptosis, adhesion, angiogenesis, and signal transduction in tumorigenesis [27–33]. For example, ZIC1 repressed the expression of *GADD45B*. *GADD45B* is induced by the activation of the p38/JNK (c-Jun N-terminal kinase) pathway [27], and an important mediator of NF-κB-JNK crosstalk and cell apoptosis [28]. JNK is another major downstream component of the MAPK cascades, and is associated with cell growth and cellular response to DNA damage [21,23,24]. In addition, we found that ZIC1 increased the expression of *RSU1* (Ras suppressor protein 1), which is reported to elevate the levels of p21<sup>CIP</sup> CDK inhibitor, as

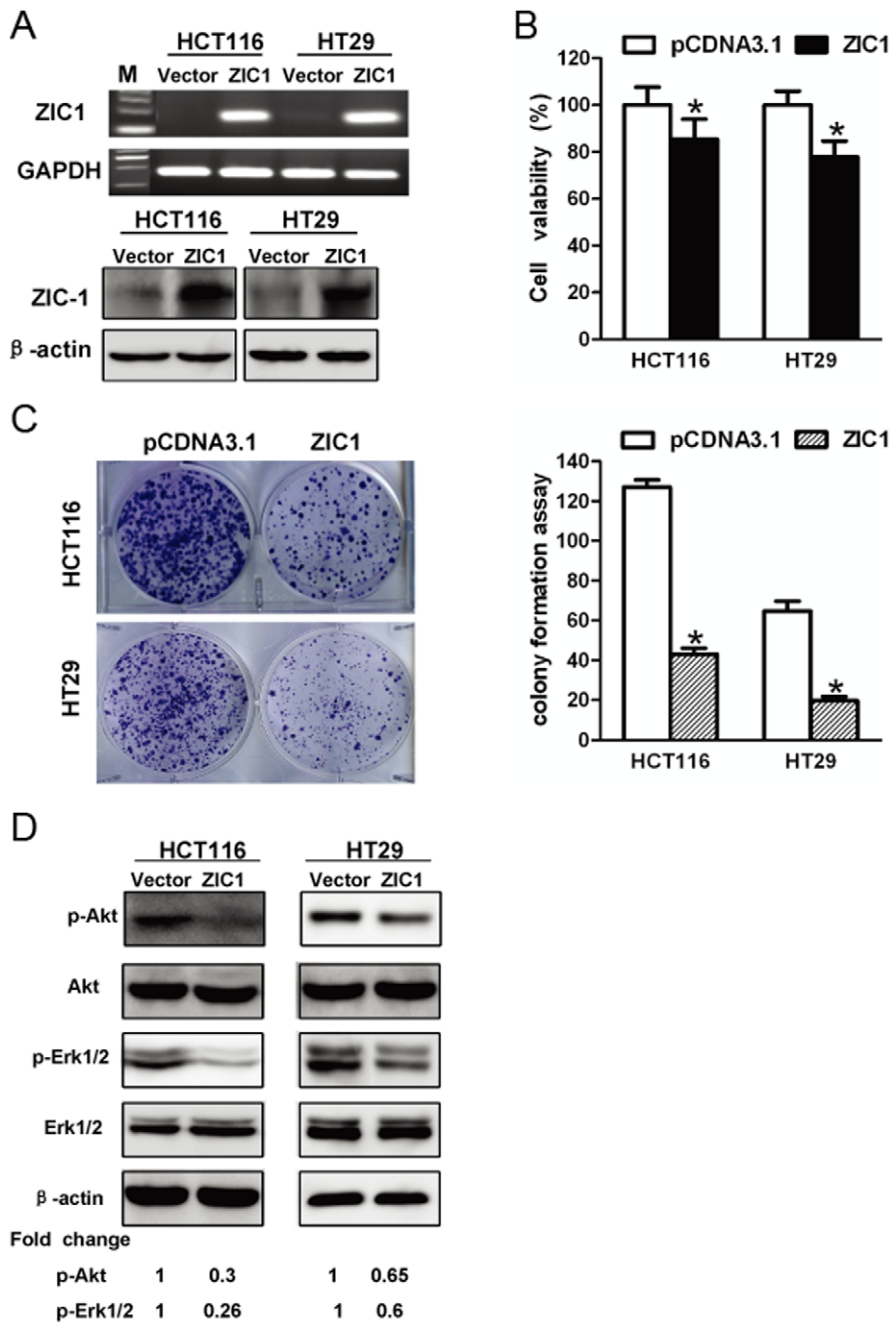

**Figure 3. ZIC1 inhibits the proliferation of colon cancer cell and regulates MAPK, PI<sub>3</sub>K/Akt pathways.** (A) Re-expression of ZIC in stable transfectants in colon cancer cells (HCT116 and HT29) was confirmed by RT-PCR (upper lane) and western blot (low lane), GAPDH and β-actin used as internal control. (B) Cell viability assay after ZIC1 re-expression in colon cell lines (HCT116 and HT29). The number of viable cells was measured by MTS assay after transiently transfected with pCDNA3.1-ZIC1 or pCDNA3.1 vector. The assay was performed in triplicate. The asterisk indicates statistical significance ( $p < 0.05$ ). (C) The effect of cell proliferation inhibition by ectopic expression of ZIC1 was determined by colony formation assay in colon cancer cells. The quantitative analysis of colony numbers formed in pCDNA3.1-ZIC1 or pCDNA3.1 vector transfectants are shown in right bar diagram in three individual experiments in HCT116 and HT29 cells. The asterisk indicates statistical significance ( $p < 0.05$ ). (D) The expression phospho-Akt and phospho-Erk1/2, as well as the total of Akt and Erk1/2 were analyzed by western blot. Band densities were quantified and protein levels (p-Akt, p-Erk1/2) were normalized to β-actin. Densitometry values (ZIC1 transfectants) are expressed as fold change compared with vector transfectants values normalized to 1.

doi:10.1371/journal.pone.0016916.g003

well as inactivate Jun and Rho-dependent kinases under EGF stimulation [29]. With our finding of ZIC suppression of p-Erk1/2, we propose that ZIC1 can regulate MAPK pathways mediated by ERK and JNK kinases. Further study is required to illustrate the mechanisms by which ZIC1 regulates these potential pathways in

cancer progression. Furthermore, we demonstrated that ZIC1 can suppress the expression of other novel genes (*TACSTD2*, *ANGPT2*, *LAMB2*, *LAMB3* and *MALAT1* etc.) related to tumor angiogenesis and metastasis. *TACSTD2* has been found associated with tumor aggressiveness and poor prognosis in epithelial cell tumors, including



**A**

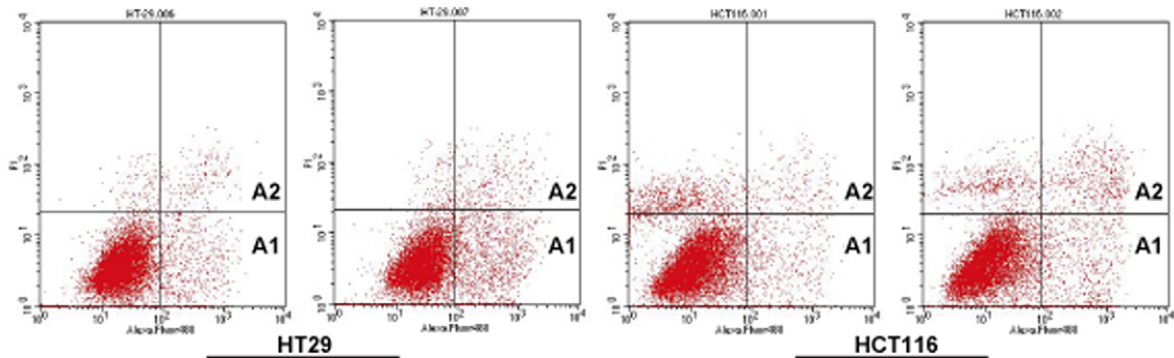

| Transfectant | HT29   |       | HCT116 |      |
|--------------|--------|-------|--------|------|
|              | Vector | ZIC1  | Vector | ZIC1 |
| A1(%)        | 6.11   | 12.37 | 5.33   | 7.27 |
| A2(%)        | 1.9    | 3.14  | 2.12   | 5.03 |

**B**

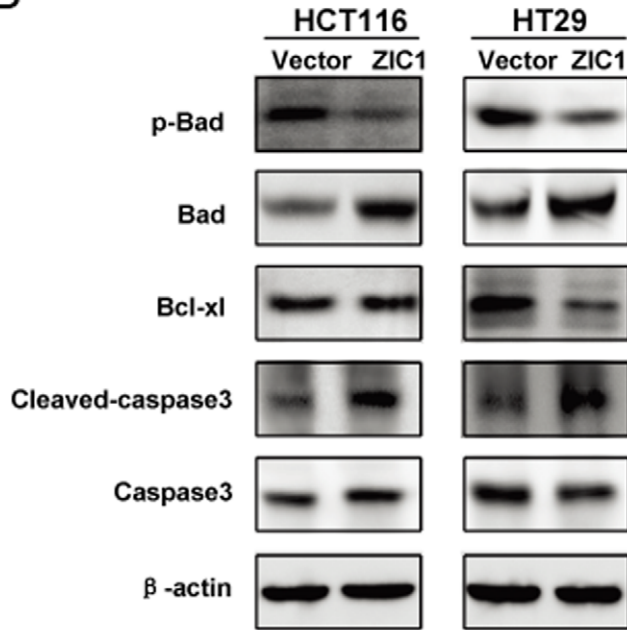

| Protein          | HCT116 |      | HT29   |      |
|------------------|--------|------|--------|------|
|                  | Vector | ZIC1 | Vector | ZIC1 |
| p-Bad            | 1      | 0.4  | 1      | 0.5  |
| Bad              | 1      | 1.7  | 1      | 1.9  |
| Bcl-xl           | 1      | 0.8  | 1      | 0.5  |
| Cleaved-caspase3 | 1      | 2    | 1      | 2.4  |

**Figure 4. Ectopic expression of ZIC1 induces cell apoptosis and modulates Bcl-xl/Bad/Caspase3 cascade.** (A) Cell apoptosis was detected by the Annexin V-PI flowcytometry assay. The representative figures are shown after transiently transfected with ZIC1 or control vector after 48 hours in HT29 and HCT116 cells. Region **A1** indicates early apoptotic cells, **A2** shows late apoptotic cells. (B) Western blot analysis of apoptotic regulated proteins. The expression of phospho-Bad and Bad, Bcl-xl, Cleaved-caspase3, and Caspase3 were detected after transfected with ZIC1 or control vector in colon cancer cell lines (HT29 and HCT116). Band densities were quantified and protein levels (p-Bad, Bad, Bcl-xl, and Cleaved-caspase3) were normalized to  $\beta$ -actin. Densitometry values (ZIC1 transfectants) are expressed as fold change compared with vector transfectants values normalized to 1.

doi:10.1371/journal.pone.0016916.g004

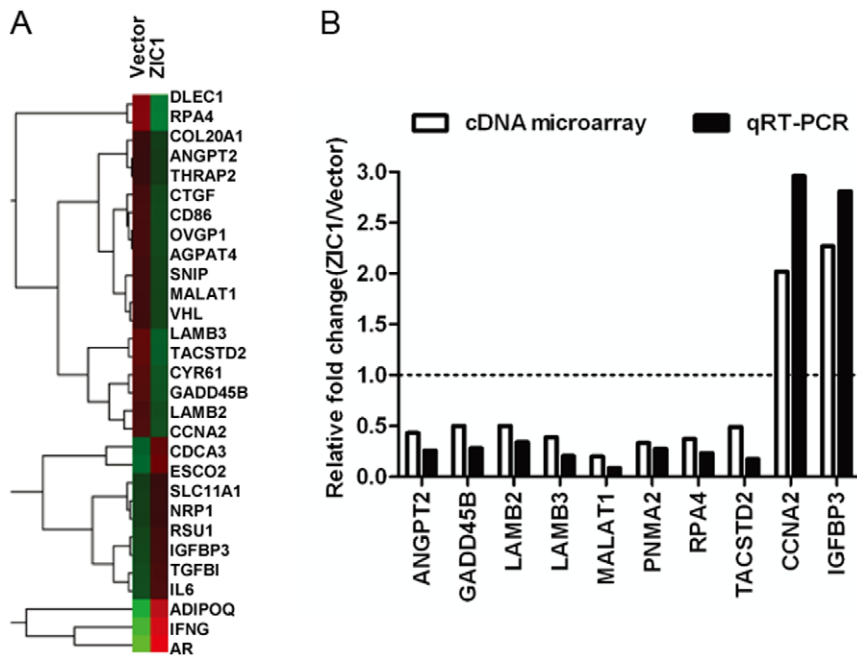

**Figure 5. The validation of ZIC1 regulating target genes.** (A) The differential expression of gene profiles in ZIC1 or control vector stable transfectants was visualized using Java Treeview in HCT116 cell lines. Representative genes over two-fold change are indicated on the right side of this image. (B) Genes transcript quantity of 10 selected genes was measured by qRT-PCR and calculated using the value of  $2^{-\Delta\Delta CT}$ . Relative gene expression in ZIC1 transfectants was compared with empty control vector, which was normalized as a reference value of 1.0. White bars indicate the result of microarray analysis, and black bars representative of qRT-PCR data in HCT116 cell line. doi:10.1371/journal.pone.0016916.g005

colon and stomach cancer [30,31]. *ANGPT2* is emerging as a key regulator of vascular remodeling during tumor angiogenesis [32,33].

As zinc finger transcription factors, the ZIC family of proteins can bind to GC-rich sequences in target genes [13,15]. ZIC1 may regulate target genes in both sequence-specific and sequence-independent manners [15]. Depending on its interaction partners, ZIC proteins can activate or suppress the transcription of target genes. As expected, we observed that ZIC1 regulated the expression of important transcription factors such as *RPS2*, *NTF3*, *PRDM16*, *KLF15*, *SHC2* and *FOXJ1* (Table S2). ZIC1 has been shown to counteract with Gli (glioma-associated oncogene homolog 1), which functions as downstream of sonic hedgehog (Shh) signaling pathway and participate in the progression of colon cancer [34–36]. Meanwhile, numerous of downstream targets of ZIC1 including Notch, Cyclin D1, and Wnt3a have been reviewed in neural development and animal models [15,37]. These genes are well known to play vital roles in cancer development. The study of ZIC1 target genes may provide further insight into the possible mechanisms of ZIC1 serving as a tumor suppressor in CRCs.

In summary, we revealed that a novel tumor suppressor gene ZIC1 was inactivated through promoter methylation in colon cancer cells. ZIC1 was also downregulated and frequently hypermethylated in primary colorectal cancer tissues. ZIC1 inhibits cell proliferation through suppression of PI<sub>3</sub>k and MAPK pathways, induction of cell apoptosis through the Bcl-xl/Bad/Caspase3 cascade, regulation of downstream targets and pathways implicated in colorectal carcinogenesis.

## Materials and Methods

### Cell culture and tissue specimens

The human colon cancer cell lines (HCT116, HT29, DLD1, LS180, SW480 and SW620) were obtained from Riken Gene

Bank (Japan) and American Type Culture Collection (ATCC, USA). HCT116 cell line was cultured in McCoy's 5A medium (Invitrogen, USA) supplemented with 10% fetal bovine serum, all other cell lines were cultured in DMEM medium (Invitrogen, USA) supplemented with 10% fetal bovine serum. All cell lines incubated at 5% CO<sub>2</sub>, 37°C and 95% humidity.

Forty surgical resected colorectal adenocarcinomas and adjacent non-tumor specimens were obtained from Sir Run Run Shaw Hospital, School of Medicine Zhejiang University. CRC was classified according to International Union Against Cancer Criteria and staged with the tumor-node-metastasis (TNM) system. Specimens were immediately frozen in liquid nitrogen and stored in -80°C until further processing. All patients provided informed written consent for obtaining the study specimens. The study protocol was approved by the Clinical Research Ethics Committee of Sir Run Run Shaw Hospital.

### Pharmacological DNA demethylation with 5-Aza-2'-Deoxycytidine

Cells were treated for 72 hours with 5 μM 5-*aza*-2'-*deoxycytidine* (Aza) (Sigma, St Louis, MO, USA), a well-used methyltransferase inhibitor. Aza was replenished every 24 hours. An equivalent concentration of the vehicle (DMSO) was used as the control.

### RT-PCR and quantitative PCR analysis

Total RNA (1 μg) was extracted using Trizol reagent (Invitrogen) following manufacturer's instruction, then reverse transcribed into cDNA with High-capacity cDNA Reverse Transcription kit (Applied Biosystems). RT-PCR was carried out for 35 cycles (95°C for 30 s, 55°C for 30 s, 72°C for 30 s). PCR product was electrophoresed in 2% agarose and stained with ethidium bromide. Quantitative real-time PCR (qRT-PCR) was performed with the SYBR Green Master Mix kit (Takara, Japan) in ABI 7500

**Table 2.** Representative gene expression profile in ZIC1 transfectants compared with empty vector control (fold change) by cDNA microarray in HCT116 cells.

| Gene Symbol | Gene Description                                     | Genbank Accession | Fold Change (*) | Gene Function                                                        |
|-------------|------------------------------------------------------|-------------------|-----------------|----------------------------------------------------------------------|
|             |                                                      |                   | Down-Regulation | cell proliferation, apoptosis, migration, adhesion, and angiogenesis |
| ANGPT2      | angiopoietin 2                                       | NM_001147         | 0.43            | angiogenesis                                                         |
| AOC3        | amine oxidase, copper containing 3                   | NM_003734         | 0.48            | cell adhesion                                                        |
| AVIL        | advillin                                             | NM_006576         | 0.47            | cell migration                                                       |
| COL20A1     | collagen, type XX, alpha 1                           | NM_020882         | 0.37            | cell adhesion                                                        |
| CTGF        | connective tissue growth factor                      | NM_001901         | 0.43            | cell proliferation/angiogenesis                                      |
| CYR61       | cysteine-rich, angiogenic inducer, 61                | NM_001554         | 0.42            | cell proliferation/cell adhesion                                     |
| DLEC1       | deleted in lung and esophageal cancer 1              | NM_007335         | 0.45            | cell proliferation                                                   |
| EFNB3       | ephrin-B3                                            | NM_001406         | 0.47            | cell differentiation                                                 |
| GADD45B     | growth arrest and DNA-damage-inducible, beta         | NM_015675         | 0.5             | cell proliferation/cell apoptosis                                    |
| KRT14       | keratin 14                                           | NM_000526         | 0.48            | epithelial cell differentiation                                      |
| LAMB2       | laminin, beta 2 (laminin 5)                          | NM_002292         | 0.5             | cell adhesion/cell migration                                         |
| LAMB3       | laminin, beta 3                                      | NM_001017402      | 0.39            | cell adhesion/cell migration                                         |
| MALAT1      | metastasis associated lung adenocarcinoma transcript | NR_002819         | 0.2             | cell proliferation/metastasis                                        |
| MLXIPL      | MLX interacting protein-like                         | NM_032951         | 0.5             | cell proliferation                                                   |
| OSM         | oncostatin M                                         | NM_020530         | 0.49            | cell proliferation                                                   |
| PNMA2       | paraneoplastic antigen MA2                           | NM_007257         | 0.33            | cell proliferation                                                   |
| PTPRH       | protein tyrosine phosphatase, receptor type, H       | NM_002842         | 0.44            | cell apoptosis                                                       |
| RPA4        | replication protein A4, 34 kDa                       | NM_013347         | 0.37            | cell proliferation                                                   |
| SNIP        | Smad nuclear interacting protein 1                   | NM_025248         | 0.46            | cell migration                                                       |
| TACSTD2     | tumor-associated calcium signal transducer 2         | NM_002353         | 0.49            | cell proliferation                                                   |
|             |                                                      |                   | Up-Regulation   | cell proliferation, apoptosis, migration, adhesion, and angiogenesis |
| CCNA2       | cyclin A2                                            | NM_001237         | 2.02            | cell proliferation                                                   |
| CDCA3       | cell division cycle associated 3                     | NM_031299         | 2.07            | cell proliferation                                                   |
| ESCO2       | establishment of cohesion 1 homolog 2                | NM_001017420      | 2.43            | cell proliferation                                                   |
| IBSP        | integrin-binding sialoprotein                        | NM_004967         | 2.11            | cell adhesion                                                        |
| IGFBP3      | insulin-like growth factor binding protein 3         | NM_001013398      | 2.27            | cell proliferation/cell apoptosis                                    |
| NRP1        | neuropilin 1                                         | NM_003873         | 2.47            | cell adhesion/angiogenesis                                           |
| ORC1L       | origin recognition complex, subunit 1-like           | NM_004153         | 2.34            | cell proliferation                                                   |
| PLEKHK1     | rhotekin 2                                           | BC025765          | 2.03            | cell proliferation                                                   |
| SPP1        | secreted phosphoprotein 1                            | NM_000582         | 2.49            | cell adhesion                                                        |
| TGFBI       | transforming growth factor, beta-induced, 68 kDa     | NM_000358         | 2.28            | cell adhesion/cell proliferation                                     |

\*Fold Change: ZIC1 versus control vector.  
doi:10.1371/journal.pone.0016916.t002

PCR system. The relative gene transcript level was normalized to house keeping gene (GAPDH) using the  $2^{-\Delta\Delta Ct}$  method. All primers sequences were listed in **Table S3**.

#### Bisulfite treatment of DNA and methylation specific PCR (MSP)

Genomic DNA (1  $\mu$ g) was bisulfite-treated with Zymo DNA modification Kit (Zymo Research, USA). Methylation status of ZIC1 was detected by methylation-specific PCR (MSP) using the bisulfite treated genomic DNA as the template. MSP was carried out for 40 cycles with annealing temperature at 60°C, as previously described [38,39]. Methylation (M) primers were: F

5'-GGATTTTTTGTTCGTAATC, R 5'-CCCGTTAACC-ACGTTAAACG, and Unmethylation (U) primers were: F 5'-GGGATTTTTTGTTCGTAATT, R 5'-CCCATTAACCA-CATTAACA.

#### Cell transfection and cell viability assay

To construct a ZIC1 expression plasmid, the full-length ZIC1 open reading frame was cloned into mammalian expression vector pCDNA3.1 as previous described [19]. To generate stable transfection cells, HCT116 and HT29 cells were transfected with pCDNA3.1-ZIC1 or pCDNA3.1 vector using Lipofectamine 2000 (Invitrogen), and selected by G418 (400  $\mu$ g/ml) for 14 days in a

12-well plate. The overexpression of ZIC1 was confirmed by RT-PCR and Western blot in the surviving colonies. Then these stable heterogeneous populations of cells were transferred into 6-well plate to continuous selection with G418 for further studies.

Cell viability was determined by 3-(4,5-dimethylthiazol-2-yl)-2-(4-sulfophenyl)-2H-tetrazolium (MTS) reagents (Promega, Madison, USA). Briefly, HCT116 and HT29 cells were cultured 24 hours in a 12-well plate and transiently transfected with pCDNA3.1-ZIC1 or pCDNA3.1. Then these cells were plated in 96-well (2000–4000 cells/well) for 48 hours. After incubation with CellTiter 96 Aqueous One Solution reagent for 1 hour, the absorbance was measured at 490 nm according to the instruction of MTS.

### Colony formation assay

HCT116 and HT29 cells were cultured in 12-well plate ( $1.0 \times 10^5$  cells/well) for 24 hours and transfected with pCDNA3.1-ZIC1 or pCDNA3.1 vector. After 48 hours, the transfectants were re-plated in 6-well plate and cultured for 12–20 days in culture medium containing G418 (400  $\mu$ g/ml). Surviving colonies were stained with Gentian Violet after methanol fixation and visible colonies ( $\geq 50$  cells) were counted. The experiments were performed in triplicate.

### Cell apoptosis and cell-cycle analysis

Cell apoptosis assays were performed using the annexin V/PI kit (Invitrogen) by flow cytometry analysis (FCA). Briefly, transiently transfected cells (HCT116, HT29) were suspended in annexin-binding buffer, Alexa Fluor 488 annexin V and PI working solution were added in sequence. The stained cells were finally analyzed by flow FACSscan flow cytometry (Becton Dickinson, USA) at 560 nm. Meanwhile,  $2 \times 10^5$  seeded cells were exposed to the ultraviolet to induce apoptosis as a positive control.

Cell cycle distribution was detected by the Cycletest Plus DNA Reagent kit (Becton Dickinson, USA). Briefly, transfected cells were harvested and washed in PBS, cellular DNA was stained with 125  $\mu$ g/mL propidium iodide for 20 minutes at 4°C in the dark. The cells then were sorted by FACS Calibur and cell-cycle distribution was determined using the ModFit LT software (Phoenix, USA).

### Western blot analysis

Total proteins were extracted from stably transfected cells using RIPA lysis buffer. Lysates (20–60  $\mu$ g) were resolved on SDS-PAGE gel and transferred to PVDF membranes (Millipore, Bedford, MA). The blots were probed with ZIC1 (1:500; Abcam), Caspase3 (1:500; Sigma-Aldrich), Bcl-xl (1:500; Sigma), Bad (1:500; Abnova), phospho-Bad (1:1000; Cell Signaling), Akt (1:500; Abcam), phospho-Akt (1:2000; Cell Signaling), Erk1/2 (p44/42) (1:1000; Cell Signaling), phospho-Erk1/2 (p44/42) (1:2000; Cell Signaling) and  $\beta$ -actin (1:2500, Multisciences Biotech) antibodies. The blots were developed using a chemiluminescence with Las-4000 Imaging System (Fujifilm, Japan).

### References

- Jemal A, Siegel R, Ward E, Hao Y, Xu J, et al. (2009) Cancer statistics, 2009. *CA Cancer J Clin* 59: 225–49.
- Grady WM, Carethers JM (2008) Genomic and epigenetic instability in colorectal cancer pathogenesis. *Gastroenterology* 135: 1079–1099.
- Jones PA, Baylin SB (2007) The epigenomics of cancer. *Cell* 128: 683–92.
- Esteller M (2008) Epigenetics in cancer. *N Engl J Med* 358: 1148–59.
- Issa JP (2004) CpG island methylator phenotype in cancer. *Nat Rev Cancer* 4: 988–93.
- Herman JG, Merlo A, Mao L, Lapidus RG, Issa JP, et al. (1995) Inactivation of the CDKN2/p16/MTS1 gene is frequently associated with aberrant DNA methylation in all common human cancers. *Cancer Research* 55: 4525–4530.
- Yu J, Tao Q, Cheung KF, Jin H, Poon FF, Wang X, et al. (2008) Epigenetic identification of ubiquitin carboxyl-terminal hydrolase L1 as a functional tumor suppressor and biomarker for hepatocellular carcinoma and other digestive tumors. *Hepatology* 48: 508–18.
- Yu J, Ma X, Cheung KF, Li X, Tian L, Wang S, et al. (2010) Epigenetic inactivation of T-box transcription factor 5, a novel tumor suppressor gene, is associated with colon cancer. *Oncogene*. Aug 30. [Epub ahead of print].
- Lee BB, Lee EJ, Jung EH, Chun HK, Chang DK, et al. (2009) Aberrant methylation of APC, MGMT, RASSF2A, and Wt-1 genes in plasma as a biomarker for early detection of colorectal cancer. *Clin Cancer Res* 15: 6185–91.

### cDNA microarray analysis and validation

Microarray studies were filtered to identify those that profiled gene expression in ZIC1 or control vector stably transfected cell line (HCT116) based on Affymetrix platform. cDNA was transcribed into cRNA with aaUTP binding, which allow incorporation of fluorescent dye Cy3 (pCDNA3.1-ZIC1) or Cy5 (pCDNA3.1). Finally, labeled samples were hybridized to Agilent whole human genome containing 41,000 probes and transcripts. Duplicate experiments were carried out. We selected  $\log_2$  ratio  $\geq 1$  or  $\leq -1$  as the threshold for upregulation or downregulation of gene expression.

The candidate ZIC1 target genes were classified into different subgroups according to their biological functions (cell proliferation, migration, and angiogenesis, etc.). Ten representatives of target genes: *ANGPT2*, *CCNA2*, *GADD45B*, *IGFBP3*, *LAMB2*, *LAMB3*, *MALAT1*, *PNMA2*, *RPA4* and *TACSTD2* were verified with qRT-PCR in ZIC1 or control vector transfectants in HCT116 and HT29 cells.

### Statistical analysis

Student's *t* and Wilcoxon matched pairs tests were performed to compare with two-independent data, while Chi-square or Fisher exact test methods to analysis categorical variables. A  $p < 0.05$  was considered statistically significant.

### Supporting Information

**Table S1 Fold change (FC) of selected genes in ZIC1 transfectants were detected by cDNA microarray and qRT-PCR.** Fold change (FC): ZIC1 versus control vector. (DOC)

**Table S2 Expression profile of representative gene associated with transcription regulator and signal transduction in ZIC1 transfectants compared with empty vector control (fold change) by cDNA microarray in HCT116 cells.** Fold change: ZIC1 versus control vector. (DOC)

**Table S3 Primer sequences used for quantitative real-time PCR.** (DOC)

### Acknowledgments

We thank Dr. Lei Guo for helpful suggestions; Dr. Yan Shan, Xiaotong Hu and Fubiao Zhang for excellent technical assistance; and Dr. Manish Gala for critical review of the manuscript.

### Author Contributions

Conceived and designed the experiments: LJW HCJ. Performed the experiments: LHG SJC JZ XW EKYL XL JBZ LJW. Analyzed the data: LHG SJC LJW HCJ. Contributed reagents/materials/analysis tools: XW HCJ THZ JY JMS LJW. Wrote the paper: LHG SJC THZ JY LJW.



10. Ang PW, Loh M, Liem N, Lim PL, Grieu F, et al. (2010) Comprehensive profiling of DNA methylation in colorectal cancer reveals subgroups with distinct clinicopathological and molecular features. *BMC Cancer* 10: 227–235.
11. Grinberg I, Millen KJ (2005) The ZIC gene family in development and disease. *Clin Genet* 67: 290–296.
12. Aruga J, Yokota N, Hashimoto M, Furuichi T, Fukuda M, et al. (1994) A novel zinc finger protein, Zic, is involved in neurogenesis, especially in the cell lineage of cerebellar granule cells. *J Neurochem* 63: 1880–1890.
13. Merzdorf CS (2007) Emerging roles for zic genes in early development. *Dev Dyn* 236: 922–940.
14. Maurus D, Harris WA (2009) Zic-associated holoprosencephaly: zebrafish ZIC1 controls midline formation and forebrain patterning by regulating Nodal, Hedgehog, and retinoic acid signaling. *Genes Dev* 23: 1461–73.
15. Aruga J (2004) The role of Zic genes in neural development. *Mol Cell Neurosci* 26: 205–21.
16. Michiels EM, Oussoren E, Van Groenigen M, Pauws E, Bossuyt PM, et al. (1999) Genes differentially expressed in medulloblastoma and fetal brain. *Physiol Genomics* 1: 83–91.
17. Wong YF, Cheung TH, Lo KW, Yim SF, Siu NS, et al. (2007) Identification of molecular markers and signaling pathway in endometrial cancer in Hong Kong Chinese women by genome-wide gene expression profiling. *Oncogene* 26: 1971–1982.
18. Pourebrahim R, Van Dam K, Bauters M, De Wever I, Sciot R, Cassiman JJ, et al. (2007) ZIC1 gene expression is controlled by DNA and histone methylation in mesenchymal proliferations. *FEBS Letters* 581: 5122–5126.
19. Wang IJ, Jin HC, Wang X, Lam EK, Zhang JB, et al. (2009) ZIC1 is downregulated through promoter hypermethylation in gastric cancer. *Biochem Biophys Res Commun* 379: 959–63.
20. Datta SR, Brunet A, Greenberg ME (1999) Cellular survival: A play in three Acts. *Genes Dev* 13: 2905–2927.
21. Chang L, Karin M (2001) Mammalian MAP kinase signaling cascades. *Nature* 410: 37–40.
22. Khor TO, Gul YA, Ithnin H, Seow HF (2004) Positive correlation between overexpression of phospho-BAD with phosphorylated Akt at serine 473 but not threonine 308 in colorectal carcinoma. *Cancer Letters* 210: 139–150.
23. Davis RJ (2000) Signal transduction by the JNK group of MAP kinases. *Cell* 103: 239–52.
24. Johnson GL, Lapadat R (2002) Mitogen-activated protein kinase pathways mediated by ERK, JNK and p38 protein kinases. *Science* 298: 1911–2.
25. Levine B, Sinha S, Kroemer G (2008) Bcl-2 family members: Dual regulators of apoptosis and autophagy. *Autophagy* 4: 600–606.
26. Adams JM, Cory S (2001) Life-or-death decisions by the Bcl-2 protein family. *Trends Biochem Sci* 26: 61–66.
27. Takekawa M, Saito H (1998) A family of stress-inducible GADD45-like proteins mediate activation of the stress-responsive MTK1/MEKK4 MAPKKK. *Cell* 95: 521–30.
28. Papa S, Zazzeroni F, Bubici C, Jayawardena S, Alvarez K, et al. (2004) Gadd45 beta mediates the NF-kappa B suppression of JNK signalling by targeting MKK7/JNKK2. *Nat Cell Biol* 6: 146–53.
29. Vasaturo F, Dougherty GW, Cutler ML (2000) Ectopic expression of Rsu-1 results in elevation of p21CIP and inhibits anchorage-independent growth of MCF7 breast cancer cells. *Breast Cancer Res Treat* 61: 69–78.
30. Wang J, Day R, Dong Y, Weintraub SJ, Michel L (2008) Identification of Trop-2 as an oncogene and an attractive therapeutic target in colon cancers. *Mol Cancer Ther* 7: 280–5.
31. Mühlmann G, Spizzo G, Gostner J, Zitt M, Maier H, et al. (2009) TROP2 expression as prognostic marker for gastric carcinoma. *J Clin Pathol* 62: 152–8.
32. Etoh T, Inoue H, Tanaka S, Barnard GF, Kitano S, et al. (2001) Angiopoietin-2 is related to tumor angiogenesis in gastric carcinoma: possible in vivo regulation via induction of proteases. *Cancer Res* 61: 2145–53.
33. Helfrich I, Edler L, Sucker A, Thomas M, Christian S, et al. (2009) Angiopoietin-2 levels are associated with disease progression in metastatic malignant melanoma. *Clin Cancer Res* 15: 1384–92.
34. Koyabu Y, Nakata K, Mizugishi K, Aruga J, Mikoshiba K (2001) Physical and functional interactions between Zic and Gli proteins. *J Biol Chem* 276: 6889–92.
35. Ruiz i Altaba A, Mas C, Stecca BA (2007) The Gli code: an information nexus regulating cell fate, stemness and cancer. *Trends Cell Biol* 17: 438–47.
36. Xie KP, Abbruzzese JL (2003) Developmental biology informs cancer: the emerging role of the hedgehog signaling pathway in upper gastrointestinal cancers. *Cancer Cell* 4: 245–7.
37. Merzdorf CS, Sive HL (2006) The zic1 gene is an activator of Wnt signaling. *Int J Dev Biol* 50: 611–7.
38. Liu X, Wang X, Zhang J, Lam EK, Shin VY, et al. (2010) Warburg effect revisited: an epigenetic link between glycolysis and gastric carcinogenesis. *Oncogene* 29: 442–450.
39. Wang X, Lau KK, So LK, Lam YW (2009) CHD5 is down-regulated through promoter hypermethylation in gastric cancer. *J Biomed Sci* 16: 95–100.
